# Supplementary material for: Population genomics supports baculoviruses as vectors of horizontal transfer of insect transposons
Source: PubMed Central journal article supplement — Nat Commun. 2014 Feb 21;5:3348. doi: 10.1038/ncomms4348 (PMC3948050; doi:10.1038/ncomms4348), 2014-02-21
Supplement: ncomms4348-s1.pdf [file ncomms4348-s1.pdf]

**Supplementary Table 1.** List of transposable elements (TE) mapped by full-length reads

| <b>Name of TE</b> | <b>Number of Reads</b> |
|-------------------|------------------------|
| AluSq10           | 1                      |
| AluYb3a2          | 1                      |
| Coprina_Cc1       | 5                      |
| EnSpm1_SB         | 2                      |
| Gypsy-33_VV-I     | 2                      |
| Gypsy1-I_Dmoj     | 1                      |
| HARLEQUIN         | 2                      |
| HaSE3             | 284                    |
| hAT6-2_SP         | 1                      |
| HERV9             | 2                      |
| IFG7_I            | 6                      |
| IFP2              | 182                    |
| L1                | 9                      |
| L1-2_Cja          | 1                      |
| L1-Y_CF           | 4                      |
| L1HS              | 7                      |
| L1M1_5            | 2                      |
| L1PA4             | 1                      |
| L1PB2c            | 2                      |
| L1Pt_5end         | 2                      |
| L1P_MA2           | 1                      |
| LTR30             | 1                      |
| MAR1_BM           | 215                    |
| MER2              | 1                      |
| Pre0_SS           | 1                      |
| SABRINA2_TM_LTR   | 2                      |
| TED               | 2                      |
| TFP3              | 2                      |

**Supplementary Table 2.** List of primers used in this study

| Name of forward primer   | Sequence of forward primer                         | Name of reverse primer   | Sequence of reverse primer                       | Usage                                                                                 |
|--------------------------|----------------------------------------------------|--------------------------|--------------------------------------------------|---------------------------------------------------------------------------------------|
| MAR1flk52221-F           | AAGACCTTTTGCTGCGGATC                               | I-R                      | GTATTGCAGCCAATGGAGACCAC                          | Verification of the presence of five MAR1 copies in the AcMNPV genome                 |
| MAR1flk14007-F           | CTTAGTCTTGATCTTGACAGGTGC                           | I-R                      | GTATTGCAGCCAATGGAGACCAC                          |                                                                                       |
| MAR1flk8565-R            | GCCCAACAACCTGGCAATTC                               | I-F                      | CTATCACAGCGATTTCGGTTCTC                          |                                                                                       |
| MAR1flk5731-R            | GTATAACCAACGCCACTATTACCAC                          | I-F                      | CTATCACAGCGATTTCGGTTCTC                          |                                                                                       |
| MAR1fl134819-R           | ACGAAGTCGCTATCAACAGG                               | I-F                      | CTATCACAGCGATTTCGGTTCTC                          |                                                                                       |
| MAR1miteF                | GAAGTGGTCTCCATTGGCTGC                              | MAR1miteR                | GGTGATAAAGAGAACCGAATCGC                          | Screening for the presence of MAR1 in various lepidopteran species                    |
| MAR1tpaseF               | GCTTAACTACCTTCTCAAGAATGGTATC                       | MAR1tpaseR               | ACAATGAGACCTCCTCTGTTTGTG                         |                                                                                       |
| I-F                      | CTATCACAGCGATTTCGGTTCTC                            | I-R                      | GTATTGCAGCCAATGGAGACCAC                          | Inverse PCR                                                                           |
| IFP2flk168525-F          | GAAACACGCGAACAGGAACACGTAG                          | IFP2-R                   | CACGCGGTCGTTATAGTTCA                             | Verification of the presence of three piggyBac copies in the AcMNPV genome            |
| IFP2flk162220-F          | GATGAATCGGGCAACGATGTC                              | IFP2-R                   | CACGCGGTCGTTATAGTTCA                             |                                                                                       |
| IFP2flk87950-F           | TTACAGCACTTCGTAGTTGTATCG                           | IFP2-R                   | CACGCGGTCGTTATAGTTCA                             |                                                                                       |
| IFP2miteF                | ATTCTTGAAATATTGCTCTCTTTTC                          | IFP2miteR                | CATGTGTTTTATCGGCTGTATATCGAG                      | Screening for the presence of piggyBac in various lepidopteran species                |
| IFP2tpase-F              | ATGGGATCTTTTATCCATCAGTGC                           | IFP2tpase-R              | GTCATCACAGAACACATTTGGTCTAGC                      |                                                                                       |
| ACTARTHROP-F<br>HCO1490F | CTGGACTTCGAGCAGGAGAT<br>TAAACTTCAGGGTGACCAAAAAATCA | ACTARTHROP-R<br>LCO2198R | CACATCTGCTGGAAGGTGGA<br>GCTCAACAATCATAAAGATATTGG | Screening for the presence of nuclear and mitochondrial DNA in baculovirus DNA sample |
